# Supplementary material for: Evolution and comparative transcriptome analysis of glucosinolate pathway genes in Brassica napus L
Source: PubMed Central journal article supplement (PMC11666375; doi:10.3389/fpls.2024.1483635), 2024-12-10
Supplement: DataSheet1.pdf [file DataSheet1.pdf]

## Supplementary Material

### 1 Supplementary Figures and Tables

#### 1.1 Supplementary Figures

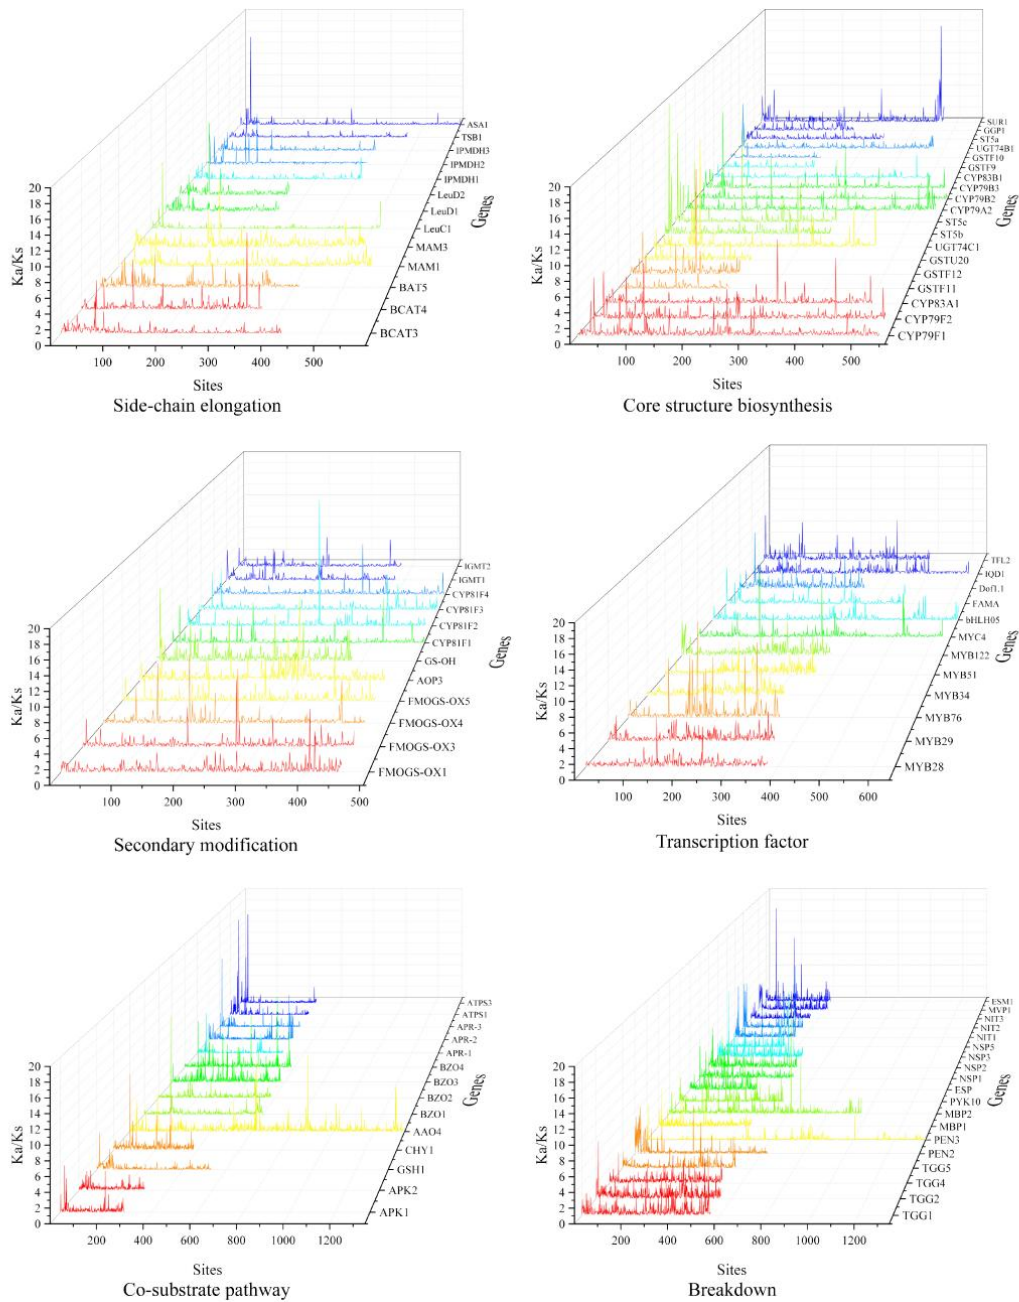

Supplementary Figure 1.. Selection pressure analyses of GSL pathway genes.



**Supplementary Figure 2.** Expression profiles of GSL biosynthetic genes at different developmental stages.

## **1.2 Supplementary Tables**

**Supplemental Table S1.** Glucosinolate (GSL) biosynthetic genes in 14 land plants.

**Supplemental Table S2.** Selective pressure of GSL pathway genes in 14 land plants.

**Supplemental Table S3.** The 344 GSL biosynthetic genes from *Brassica napus* identified in this study.

**Supplemental Table S4.** Syntenic relationship of GSL biosynthesis genes in *B. napus*, *Brassica rapa*, and *Brassica oleracea*.

**Supplemental Table S5.** Regulatory network of the 344 GSL biosynthetic genes.

**Supplemental Table S6.** Cis-acting regulatory elements of the 344 GSL biosynthetic genes.

**Supplemental Table S7.** Quality control information of Zhongyou 821 (ZY821) and Zhongshuang11 (ZS11) RNA-seq dataset in *B. napus*.

**Supplemental Table S8.** The 188 GSL genes were differentially expressed in more than one organ between ZS11 and ZY821.

**Supplemental Table S9.** The 65 candidate genes that may mainly contribute to GSL content difference in ZY821 and ZS11.
